# Supplementary material for: Glucosamine modified near-infrared cyanine as a sensitive colorimetric fluorescent chemosensor for aspartic and glutamic acid and its applications
Source: Royal Society of Chemistry journal article supplement (doi:10.1039/c4nj00266k), 2014-01-01
Supplement: c4nj00266k1.pdf [file c4nj00266k1.pdf]

## Supporting Information

### Glucosamine Modified Near-infrared Cyanine as a Sensitive Colorimetric Fluorescent Chemosensor for Aspartic and Glutamic Acid and its Application

Xu Zhao<sup>1</sup>, Ruisong Wei<sup>2</sup>, Ligong Chen<sup>1,3</sup>, Di Jin<sup>1</sup>, Xilong Yan<sup>1,3</sup>

1. School of Chemical Engineering and Technology, Tianjin University, Tianjin 300072, P. R. China
2. Department of Chemistry and Life Sciences, Hechi University, Yizhou 546500, P. R. China
3. Collaborative Innovation Center of Chemical Science and Engineering (Tianjin), P. R. China

#### Table of contents

1. Fig.S1 <sup>1</sup>H NMR (600 MHz, CDCl<sub>3</sub>) spectrum of compound 1
2. Fig.S2 <sup>1</sup>H NMR (600 MHz, CDCl<sub>3</sub>) spectrum of compound 2.
3. Fig.S3 <sup>13</sup>C NMR (150 MHz, CDCl<sub>3</sub>) spectrum of compound 2.
4. Fig.S4 <sup>1</sup>H NMR (600 MHz, CDCl<sub>3</sub>) spectrum of compound 4.
5. Fig.S5 <sup>13</sup>C NMR (150 MHz, CDCl<sub>3</sub>) spectrum of compound 4.
6. Fig.S6 <sup>1</sup>H NMR (600MHz, MeOD) spectrum of compound 5.
7. Fig.S7 <sup>1</sup>H NMR (600MHz, DMSO-*d*<sub>6</sub>) spectrum of compound TM.
8. Fig.S8 ESI Mass spectrum of compound 2.
9. Fig.S9 Tof MS ES<sup>+</sup> spectrum of compound 4.
10. Fig.S10 Tof MS ES<sup>+</sup> spectrum of compound 5.
11. Fig.S11 Tof MS ES<sup>+</sup> spectrum of TM.

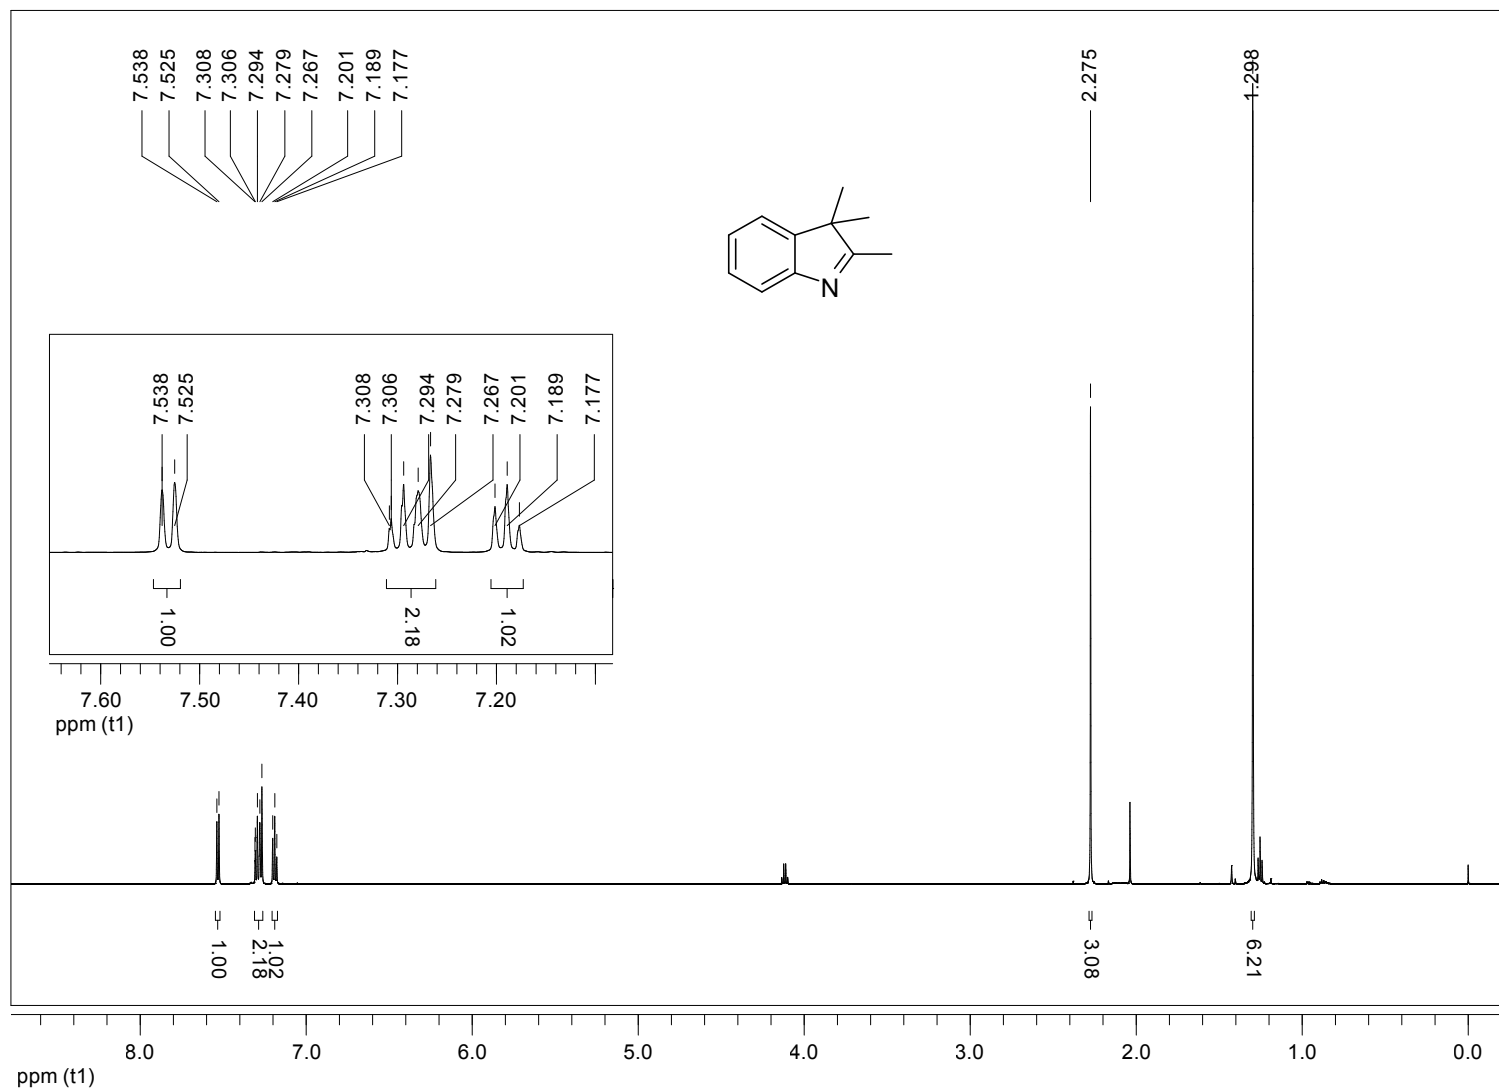

Fig.S1 <sup>1</sup>H NMR (600 MHz, CDCl<sub>3</sub>) spectrum of compound 1.

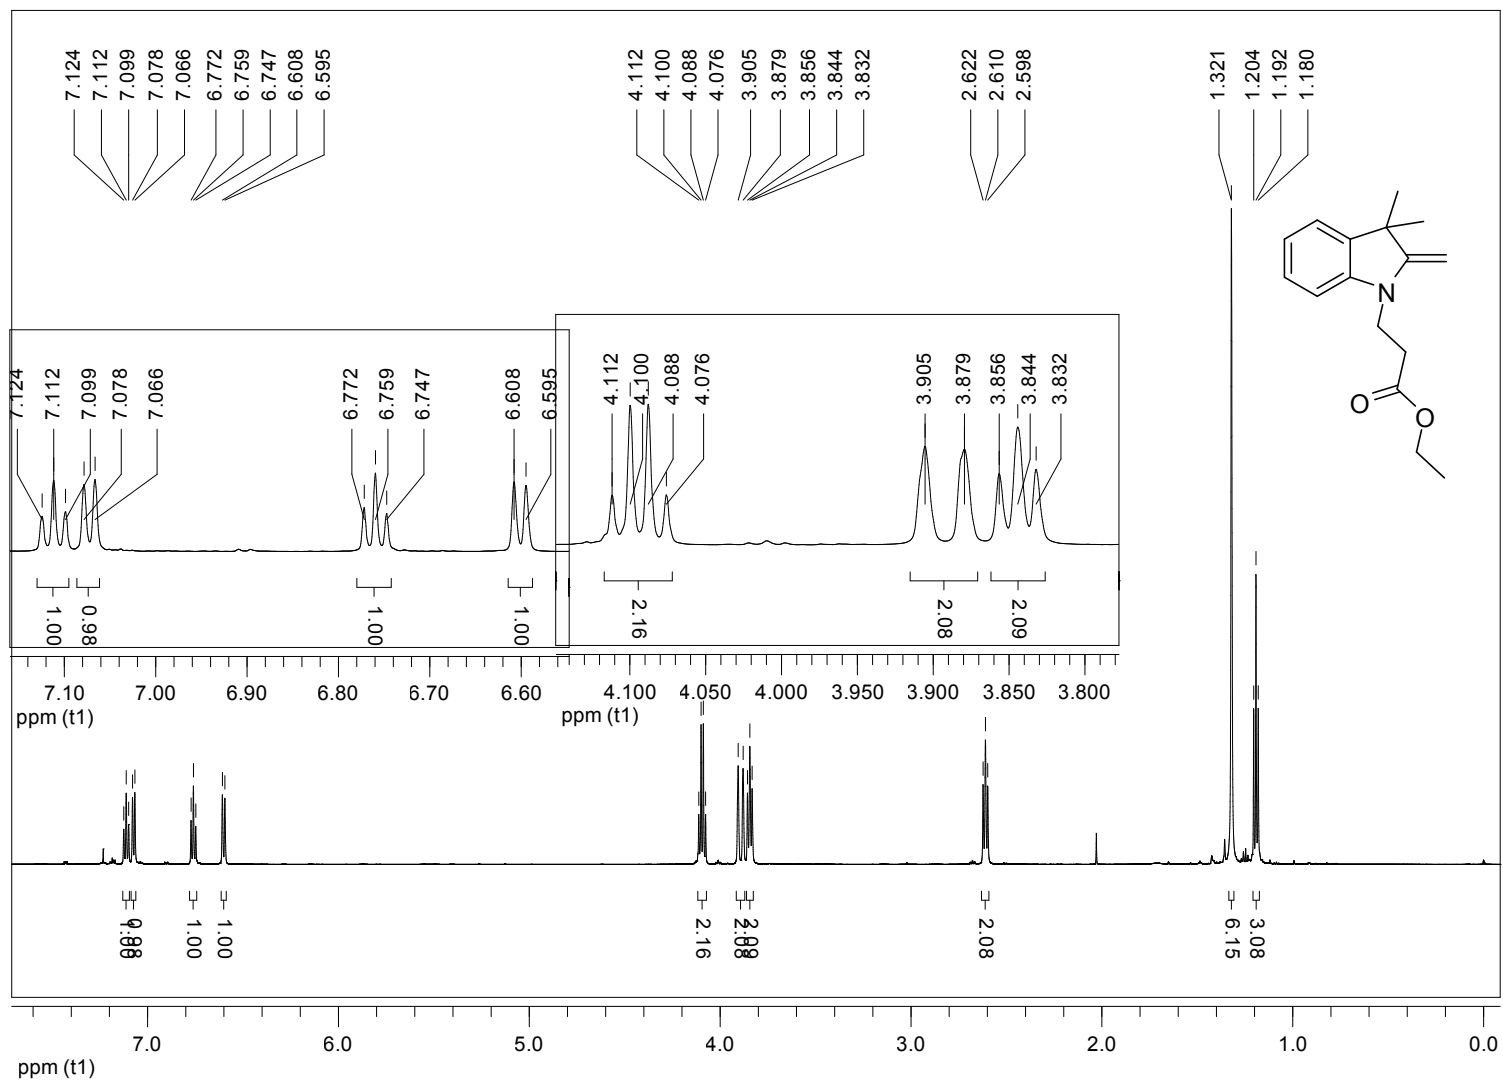

Fig.S2 <sup>1</sup>H NMR (600 MHz, CDCl<sub>3</sub>) spectrum of compound 2.

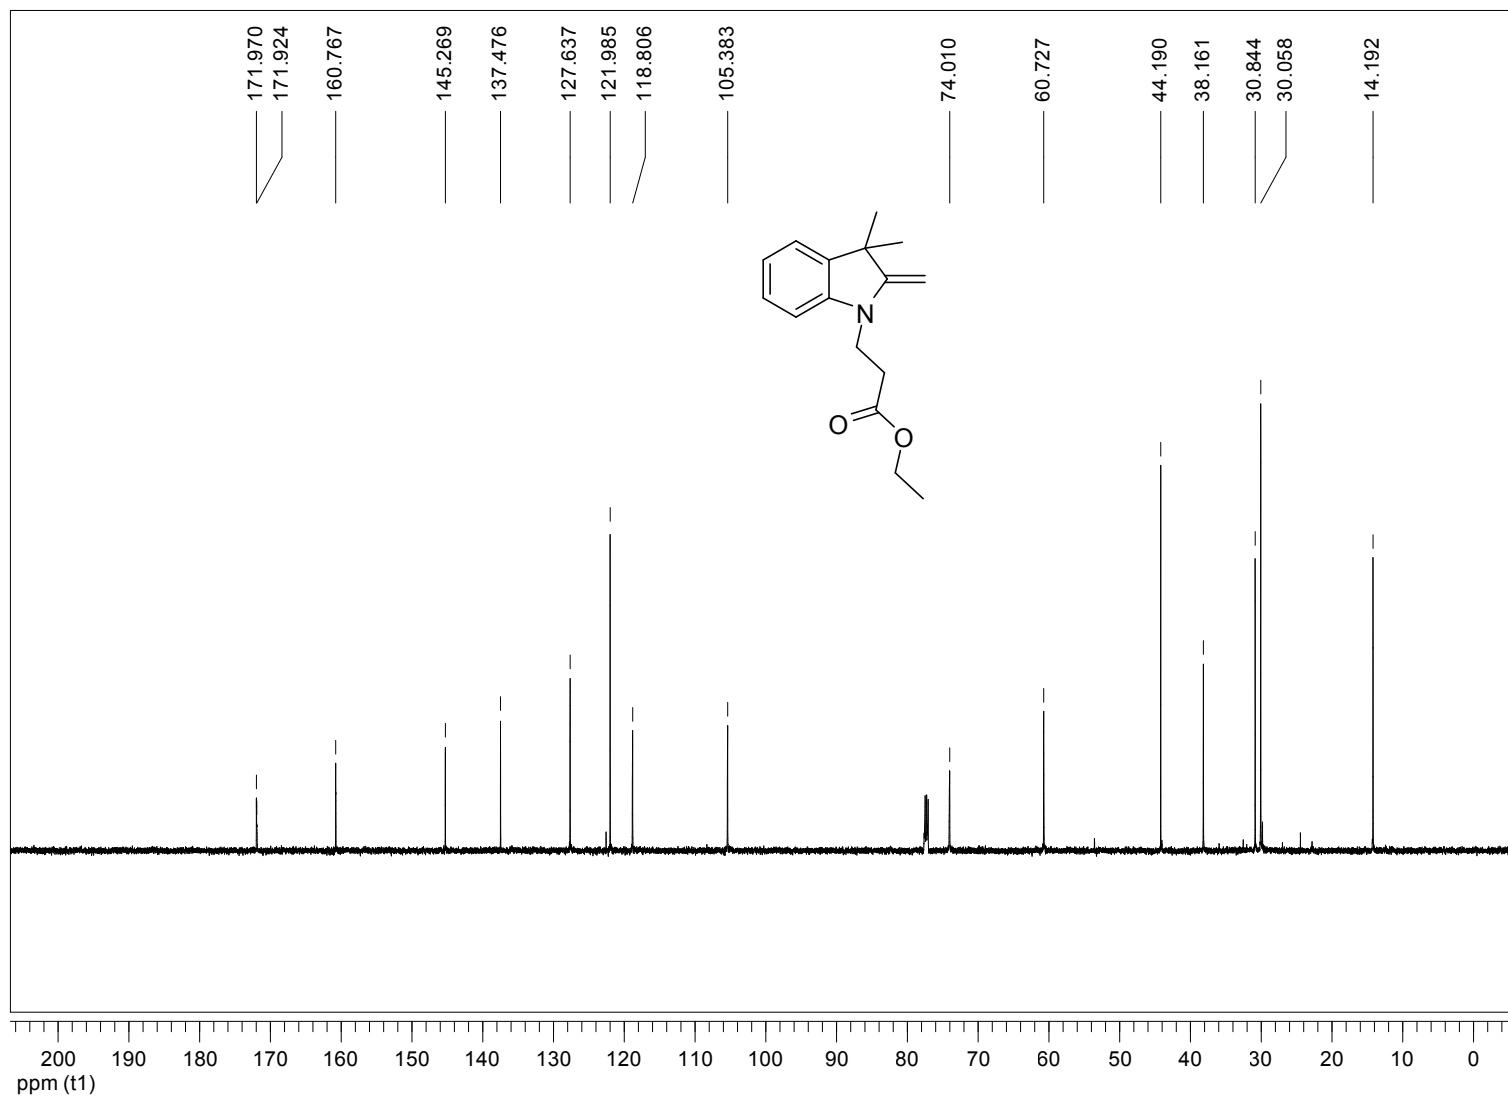

Fig.S3 <sup>13</sup>C NMR (150 MHz, CDCl<sub>3</sub>) spectrum of compound 2.

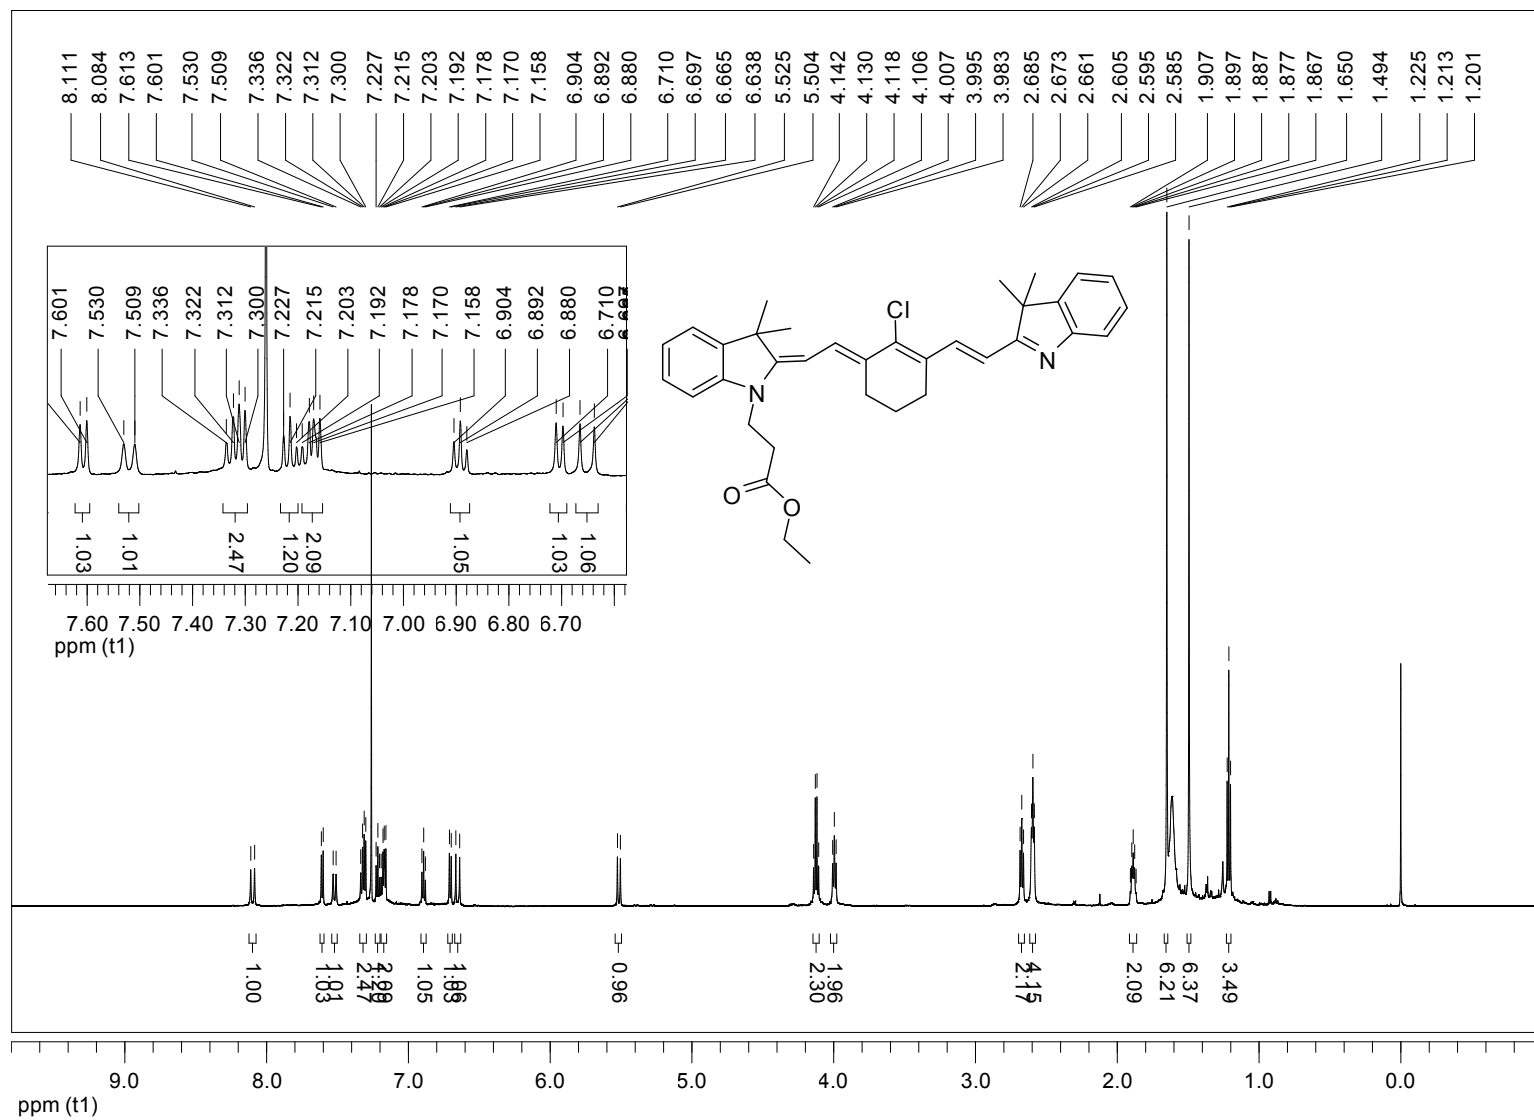

Fig.S4 <sup>1</sup>H NMR (600 MHz, CDCl<sub>3</sub>) spectrum of compound 4.

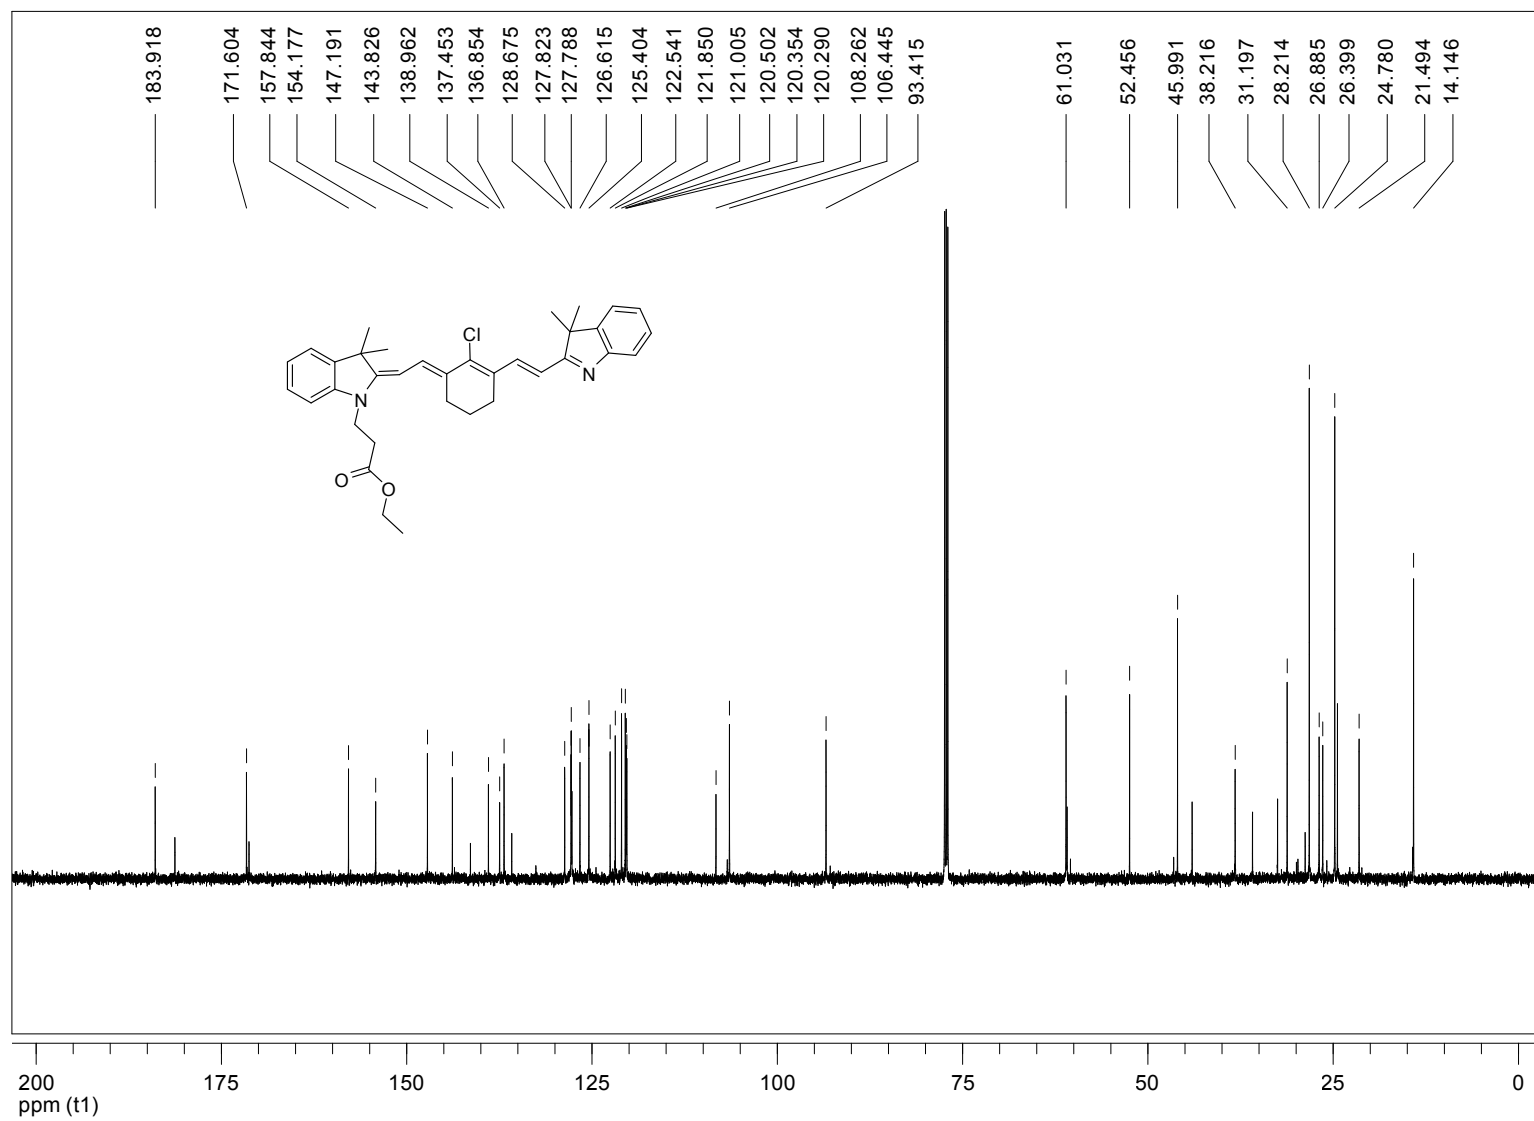

Fig.S5 <sup>13</sup>C NMR (150 MHz, CDCl<sub>3</sub>) spectrum of compound 4.

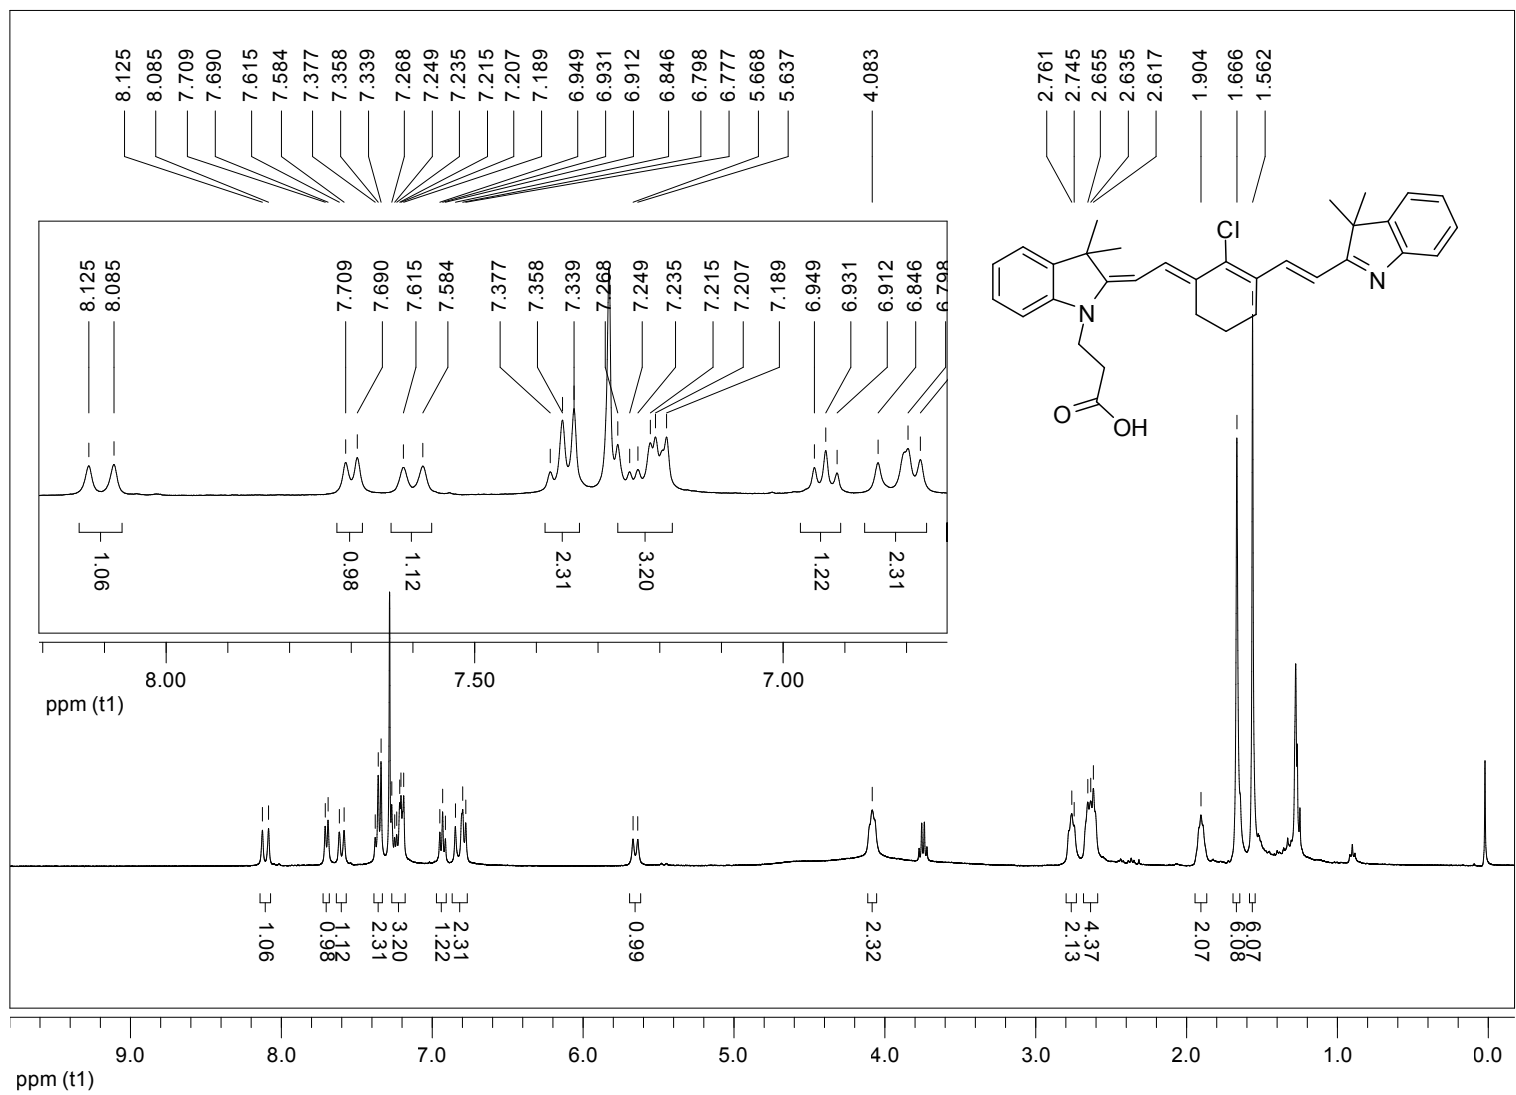

Fig.S6 <sup>1</sup>H NMR (600MHz, MeOD) spectrum of compound 5.

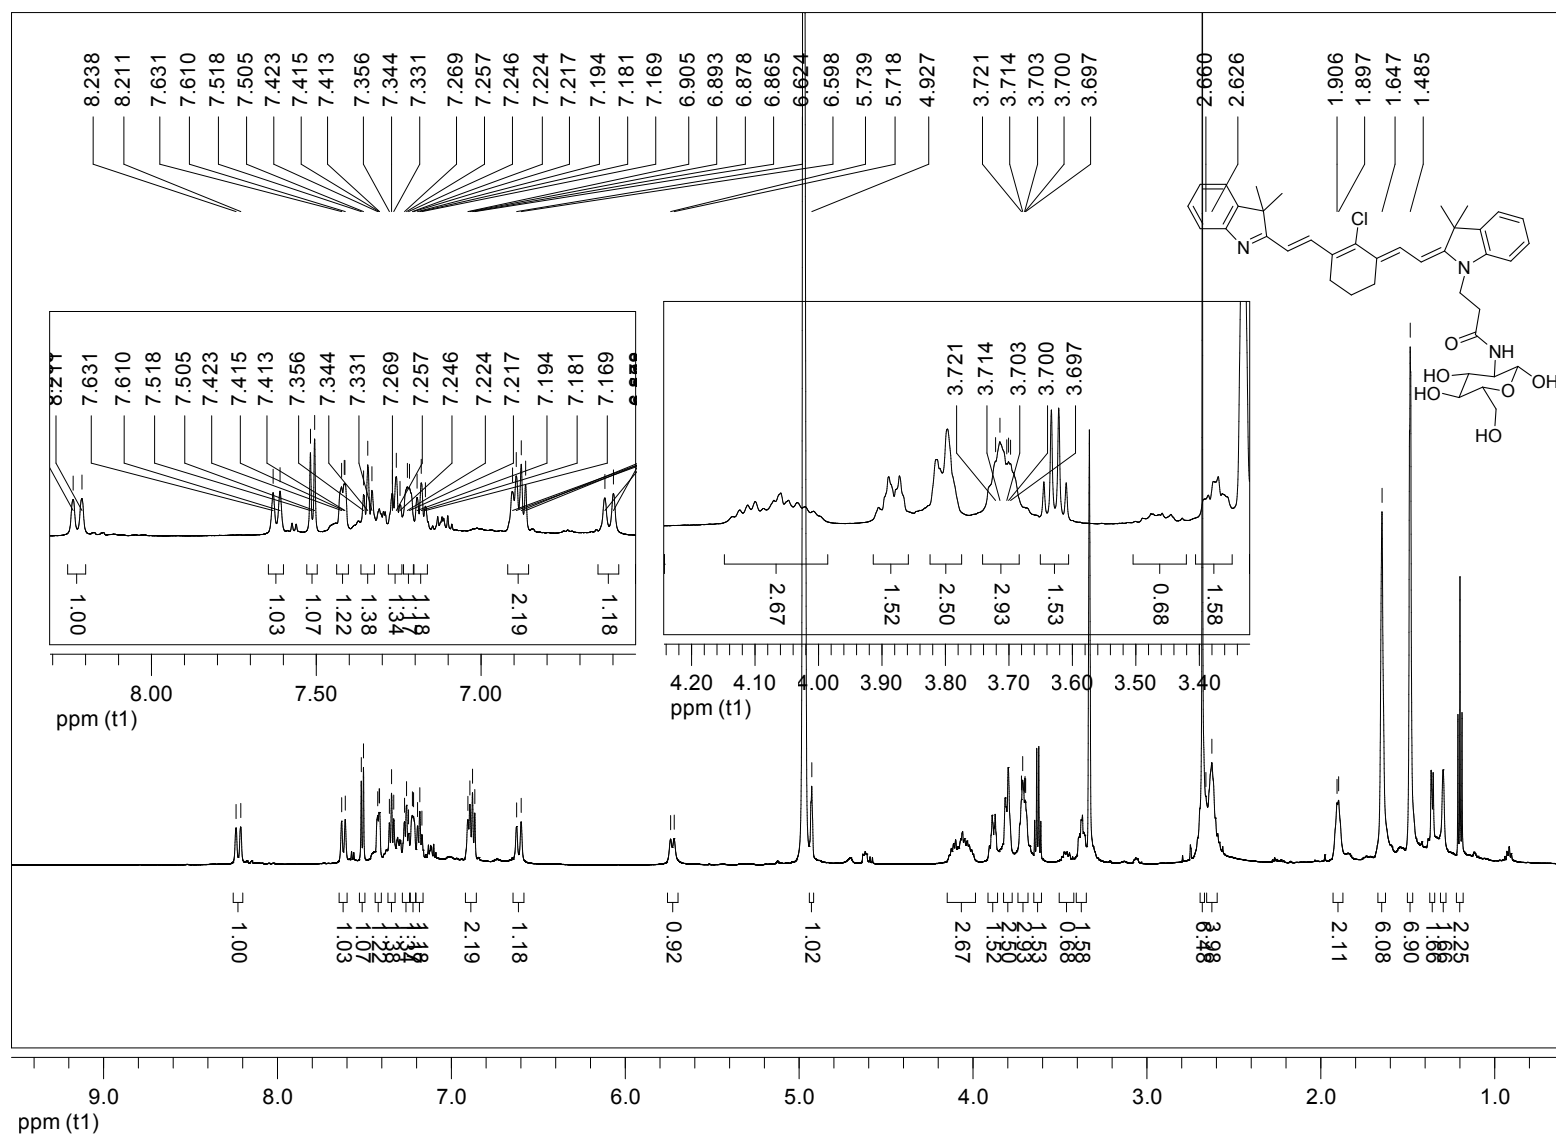

Fig.S7 <sup>1</sup>H NMR (600MHz, DMSO-*d*<sub>6</sub>) spectrum of compound TM.



ZX-3-S-6 #1 RT: 0.01 AV: 1 NL: 6.64E8  
T: + c ESI Full ms [100.00-350.00]

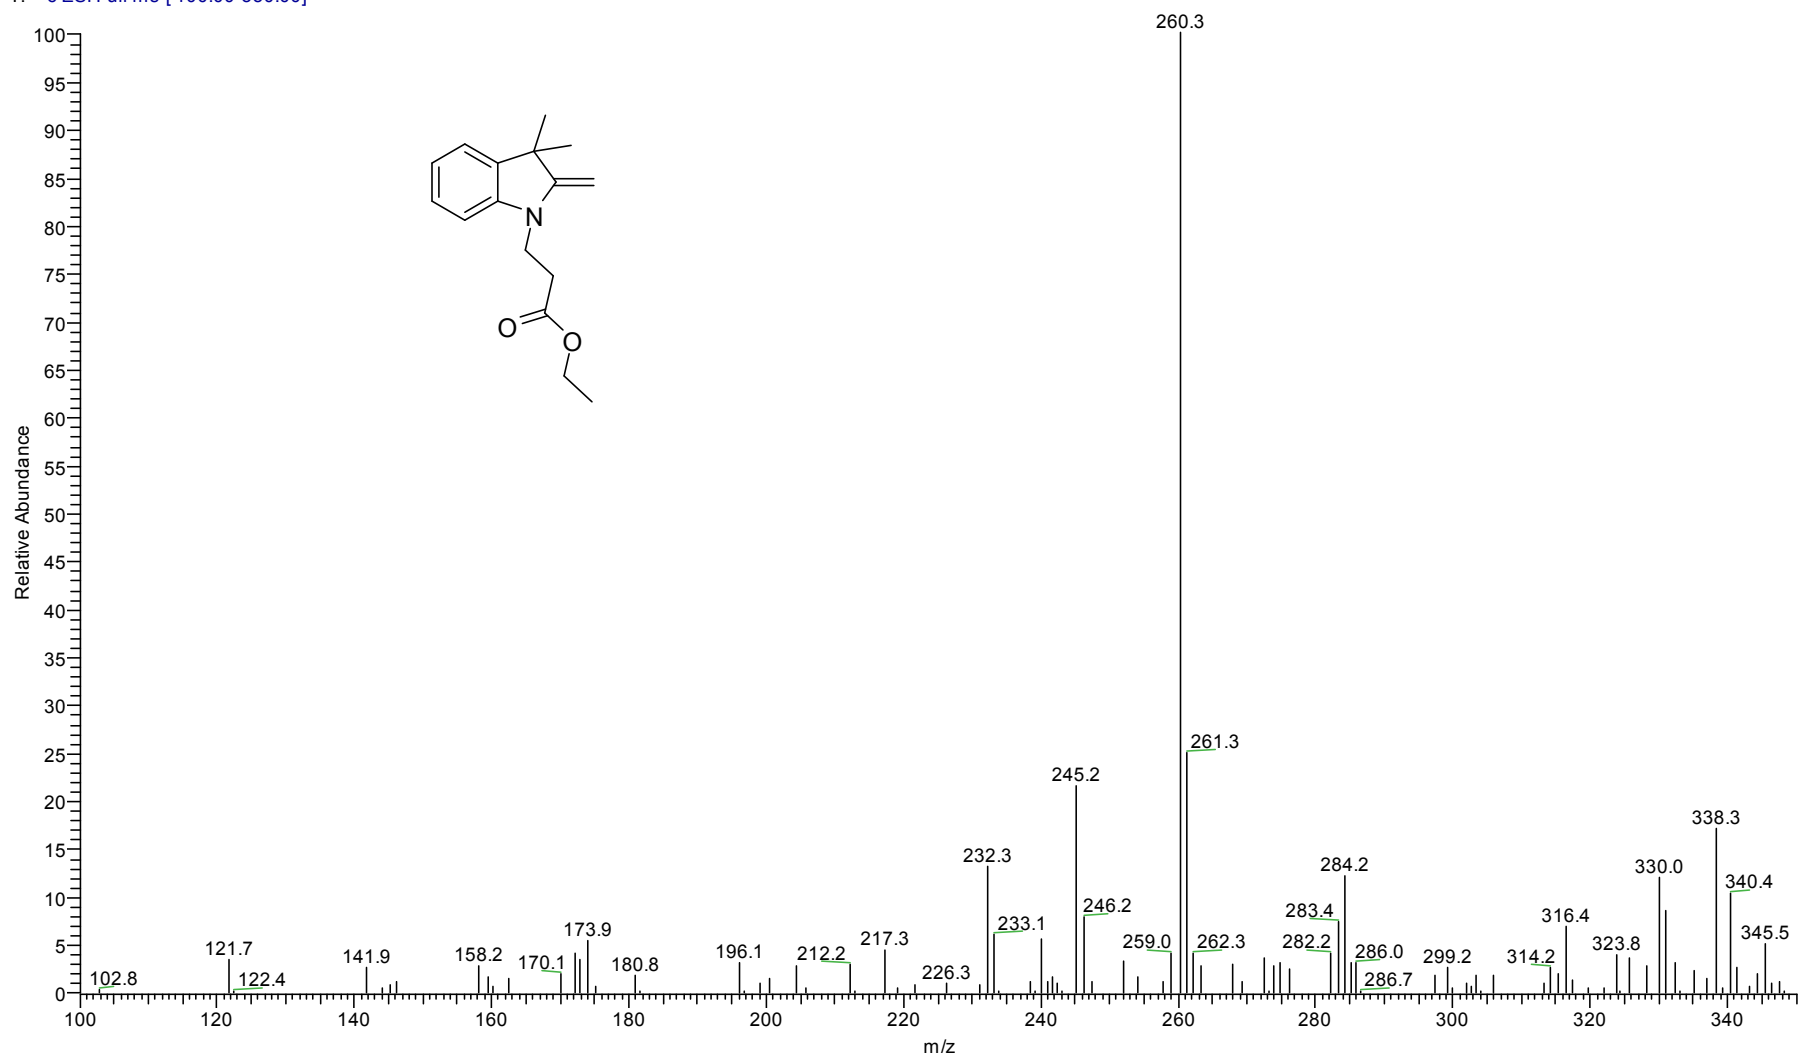

Fig.S8 ESI Mass spectrum of compound 2.

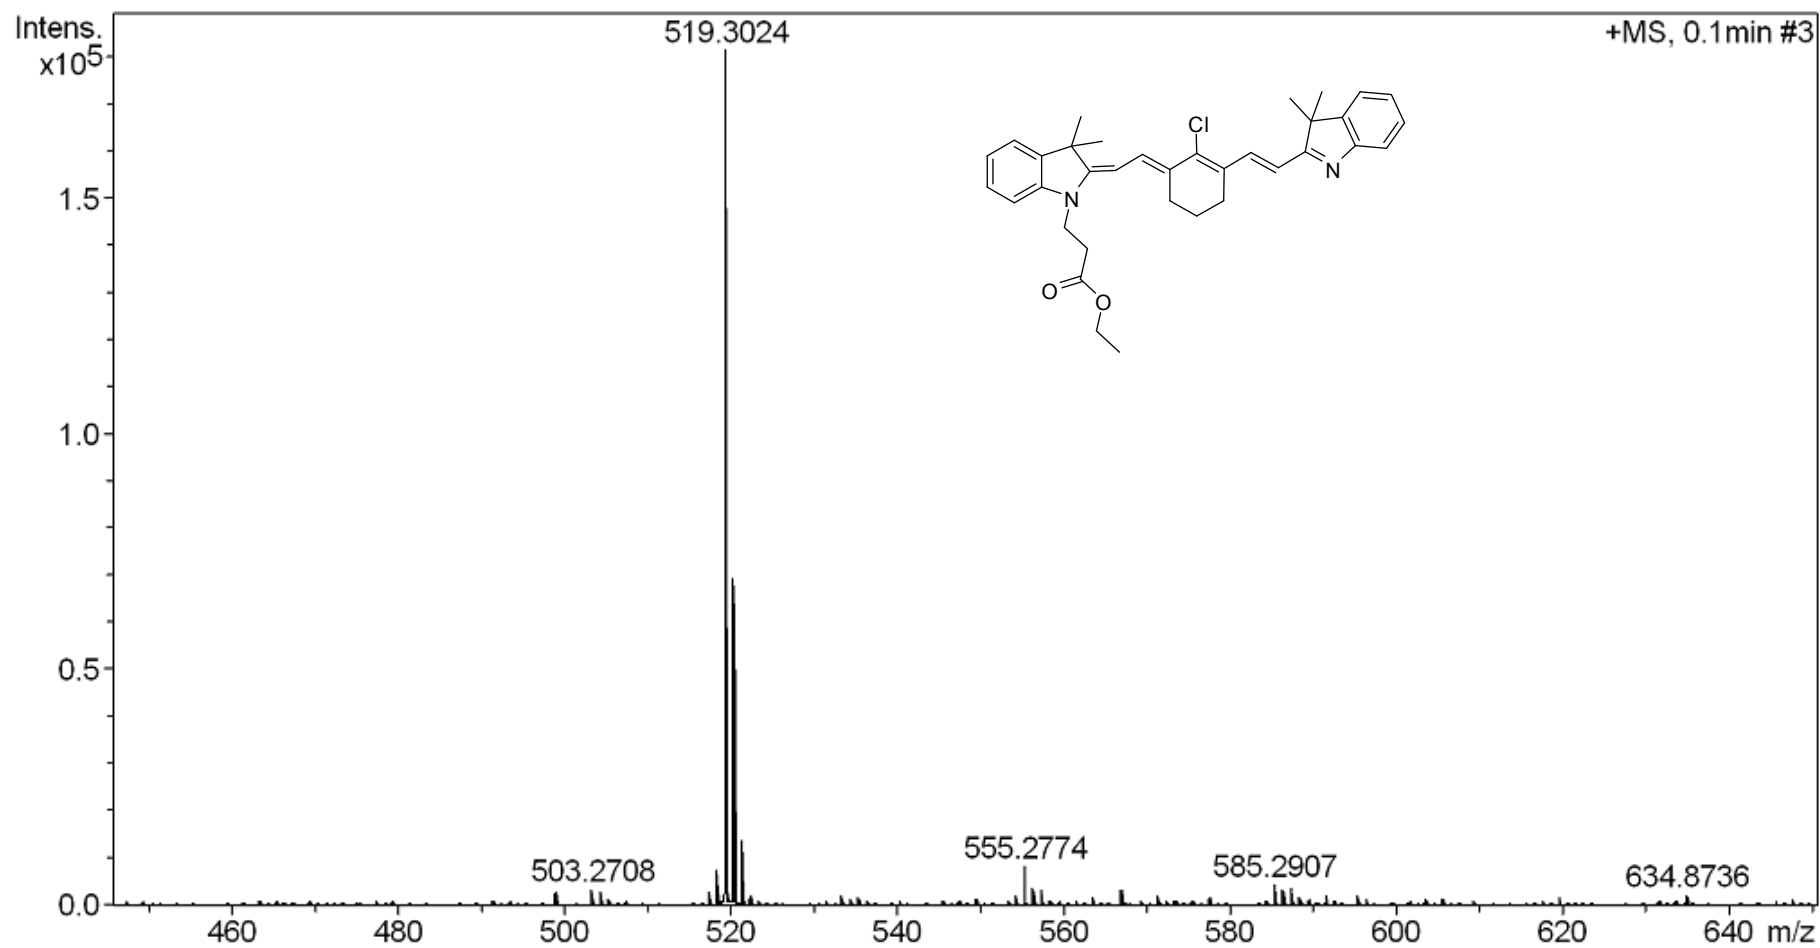

Fig.S9 Tof MS ES<sup>+</sup> spectrum of compound 4.

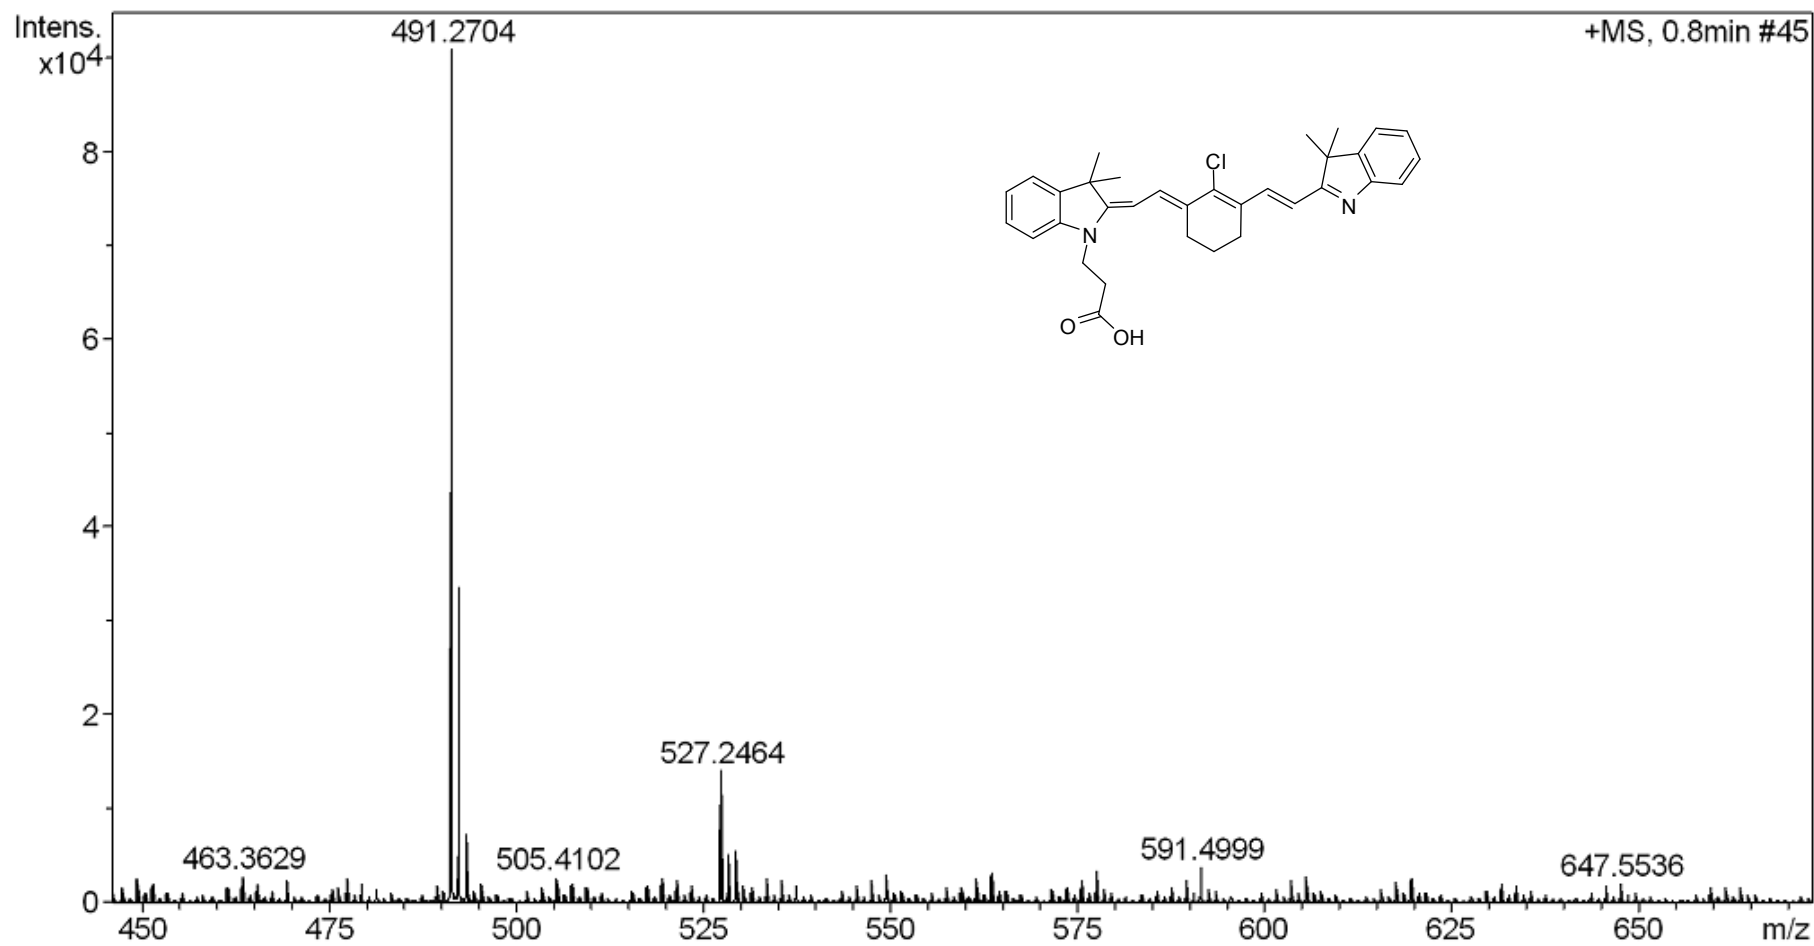

Fig.S10 Tof MS ES<sup>+</sup> spectrum of compound 5.

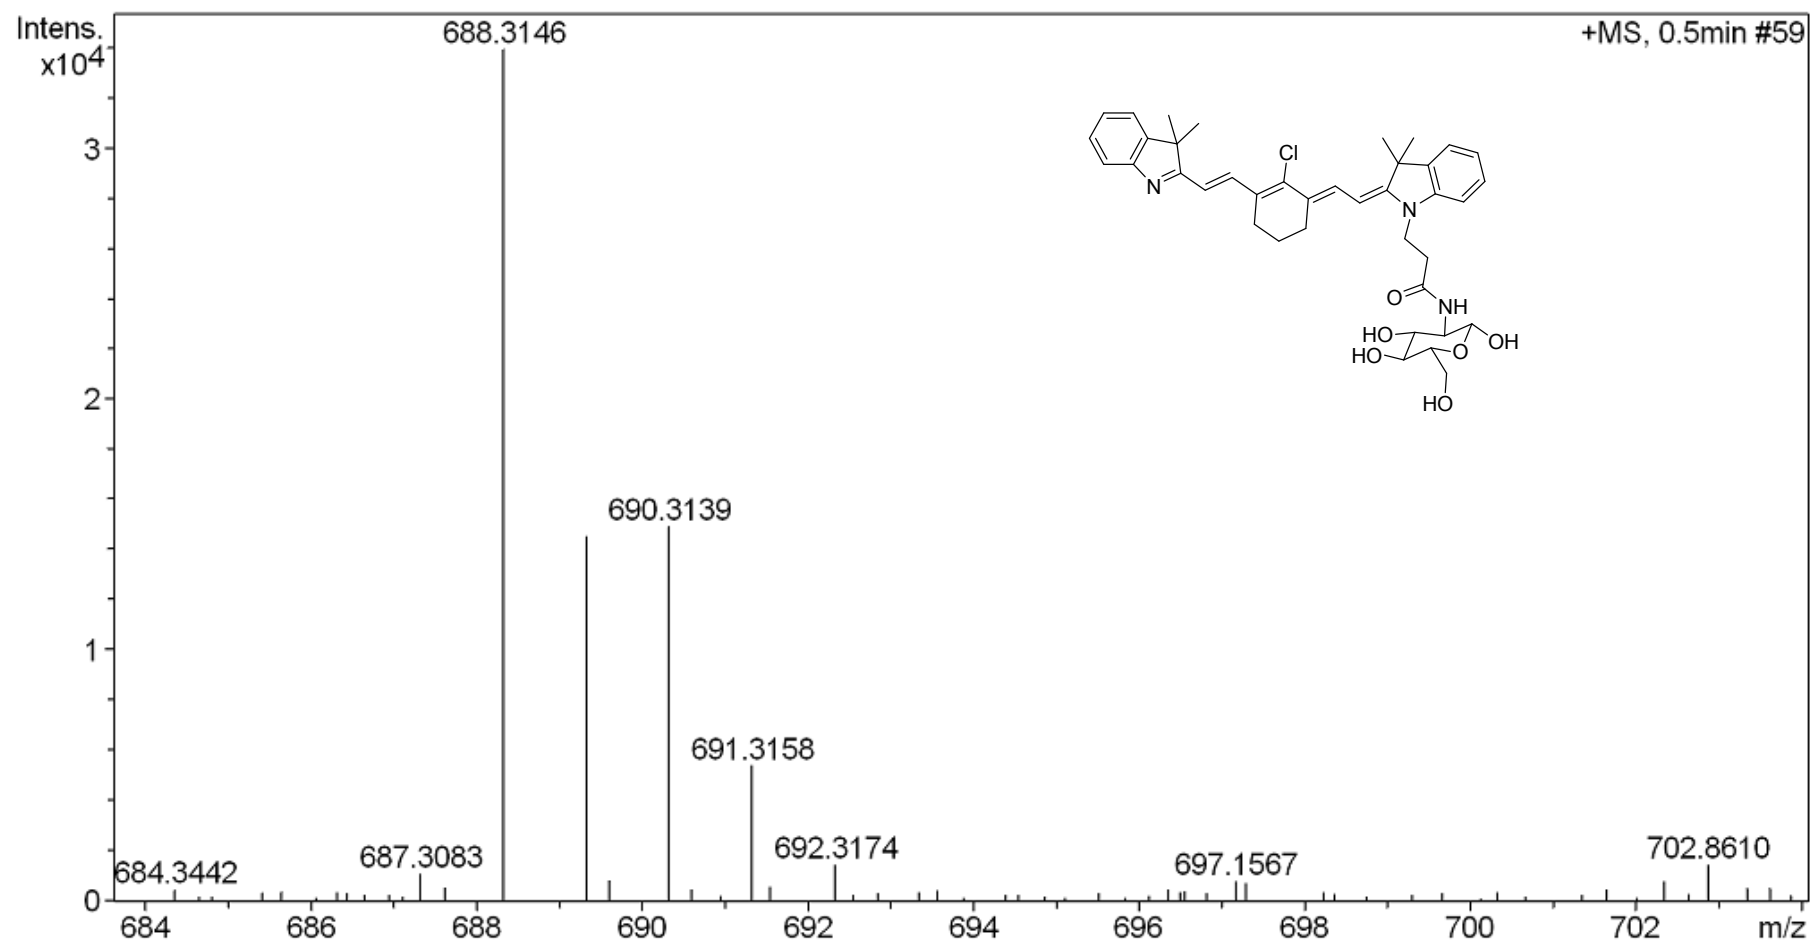

Fig.S11 Tof MS ES<sup>+</sup> spectrum of TM.
